# Supplementary material for: CD93 is expressed on chronic myeloid leukemia stem cells and identifies a quiescent population which persists after tyrosine kinase inhibitor therapy
Source: PubMed Central journal article supplement (PMC7272220; doi:10.1038/s41375-019-0684-5), 2020-01-02

**Table S1: Patient sample characteristics**

| Identifier                                | Age | Gender  | Subtype    | Breakpoint                      | Pre-treatment |
|-------------------------------------------|-----|---------|------------|---------------------------------|---------------|
| CML110                                    | 48  | F       | CP         | P210                            | None          |
| CML111                                    | NK  | NK      | CP         | P210                            | NK            |
| CML332                                    | 62  | F       | CP         | P210                            | None          |
| CML339                                    | 34  | F       | CP         | P210                            | None          |
| CML340                                    | 55  | M       | CP         | P210                            | None          |
| CML342                                    | 54  | M       | CP         | P210                            | None          |
| CML343                                    | 46  | M       | CP         | P210                            | None          |
| CML347                                    | 34  | F       | CP         | P210                            | Imatinib      |
| CML350                                    | NK  | NK      | CP         | P210                            | NK            |
| CML351                                    | NK  | NK      | CP         | P210                            | NK            |
| CML373                                    | 48  | M       | CP         | P210                            | None          |
| CML385                                    | 51  | M       | CP         | P210                            | None          |
| CML388                                    | 61  | F       | CP         | P210                            | None          |
| CML391                                    | 33  | F       | CP         | P210                            | Interferon    |
| CML393                                    | 35  | M       | CP         | P210                            | None          |
| CML395                                    | 34  | M       | CP         | P210                            | None          |
| CML399                                    | 51  | M       | CP         | P210                            | None          |
| CML407                                    | 50  | M       | CP         | P210                            | None          |
| CML456                                    | 58  | M       | CP         | P210                            | None          |
| <b>DESTINY samples – Bone marrow MNCs</b> |     |         |            |                                 |               |
| Identifier                                |     | Subtype | Breakpoint | Relapsed on TKI discontinuation |               |
| 046-325                                   |     | CP      | P210       | Yes                             |               |
| 069-305                                   |     | CP      | P210       | Yes                             |               |
| 161-302                                   |     | CP      | P210       | Yes                             |               |
| 364-064                                   |     | CP      | P210       | No                              |               |
| 364-067                                   |     | CP      | P210       | No                              |               |
| 364-078                                   |     | CP      | P210       | Yes                             |               |
| 364-082                                   |     | CP      | P210       | No                              |               |
| 364-084                                   |     | CP      | P210       | No                              |               |

NK = not known

**Table S2: Primer sequences**

|                  | <b>Forward</b>             | <b>Reverse</b>              |
|------------------|----------------------------|-----------------------------|
| <b>ABL-A3-B</b>  | GTTTGGGCTTCACACCATTCC      | -                           |
| <b>ATM</b>       | CGGAGCTGATTGTAGCAACATACTA  | CAGATAGAGCCTGAAGTACACAGAG   |
| <b>ATR</b>       | CAGCTCTCTATGAAGGCCATTCAA   | GTTCTACTGTTTCACTGTCTGTTGC   |
| <b>BCL2</b>      | ATCGCCCTGTGGATGACTGAGT     | GCCAGGAGAAATCAAACAGAGGC     |
| <b>BCR-C5R</b>   | BCR-C5R                    | -                           |
| <b>BMI1</b>      | GCATCGAACAACGAGAATCA       | GCTGGTCTCCAGGTAACGAA        |
| <b>C-JUN</b>     | CTTGAAAGCTCAGAACTCGGAG     | CTGCGTTAGCATGAGTTGGC        |
| <b>CCND1</b>     | CAGAAGGAGATTGTGCCATCC      | GAAGCGGTCCAGGTAGTTCA        |
| <b>CCNA1</b>     | CTCGTAGGAACAGCAGCTATGC     | GCTAGAACTTTCAGAAGCAAGTGTTCC |
| <b>CCNA2</b>     | TGGCGGTAAGTCCGG            | CAAGGAGGAACGGTGACATGC       |
| <b>CCNB1</b>     | CAGCTCTGGGGACATTGGTAAC     | ACTGGCACCAGCATAGGTACC       |
| <b>CCND1</b>     | CAACGTGCAAGCCTCGGA         | CAAAGTGCTGATCCCTTAAGTATGTC  |
| <b>CCND2</b>     | CAAGTTGATGCTCTTAAAGATGCTCC | GCAGCAGTCAGTATTCTGTACTGG    |
| <b>CD79A</b>     | GAACGAGAAGCTCGGGTTG        | TGCCACATCCTGGTAGGT          |
| <b>CD93</b>      | GGCAGACAGTTACTCCTGGGTT     | GGAGTTCAAAGCTCTGAGGATGG     |
| <b>CDC25A</b>    | GTCTAGATTCTCCTGGGCCATTG    | CAGAATGGCTCCTCTCAGAGC       |
| <b>CDC25B</b>    | GGATTTGTGGACATCCTAGAGAGT   | ACTTGCTGTACATGACGAGGT       |
| <b>CDC25C</b>    | CACTCAGCTTACCCTTCTGCAG     | GGGCTACATTTTATTAGGTGCTGG    |
| <b>CDK2</b>      | GCCTGATTACAAGCCAAGTTTCC    | TCCGCTTGTTAGGGTCGTAGT       |
| <b>CDK4</b>      | GAAACTCTGAAGCCGACCAG       | AGGCAGAGATTTCGTTGTGT        |
| <b>CDK6</b>      | CCTGCAGGGAAAGAAAAGTGC      | CCTCCTCTCCCTCCTCGAA         |
| <b>CDKN2A</b>    | CCGAATAGTTACGGTCTGGAGG     | CACGGGTCTGGGTGAGAGT         |
| <b>CDKN2B</b>    | GGTGGCTACGAATCTTCCG        | CCTAAGTTGTGGGTTACCA         |
| <b>CHEK1</b>     | CCATCAGCAAGAATTACCATTCCAG  | CTGGGAGACTCTGACACACC        |
| <b>CHEK2</b>     | ATGAGAACCTTATGTGGAACCCC    | GCTCAGAGAAAGGTGGATACCC      |
| <b>CSF1R</b>     | GGACATTCATCAACGGCTCT       | GCTCAGGACCTCAGGGTATG        |
| <b>CSF2R</b>     | GTTACCACACCCAGCATTCC       | TTGGCAGTCCCAGCTTAAAT        |
| <b>CSF3R</b>     | TGGGACCCAGGAATCTATCA       | ATGAGGCAGGAGAGGTTGTG        |
| <b>CYC1</b>      | ACTGCGGGAAGGTCTCTACTT      | GGGTGCCATCGTCAAACCTTA       |
| <b>CYCLIN D3</b> | TGGATGCTGGAGGTATGTGA       | TGCACAGTTTTTCGATGGTC        |
| <b>CYCLIN E1</b> | GTCCTGGCTGAATGTATACATGC    | CCCTATTTTGTTCAGACAACATGGC   |
| <b>DTX1</b>      | AATCCCGAGGATGTGGTTCCG      | GTAGCCTGATGCTGTGACCA        |
| <b>E2F1</b>      | GGACCTGGAAACTGACCATCAG     | CAGTGAGGTCTCATAGCGTGAC      |
| <b>E2F2</b>      | CTCTCTGAGCTTCAAGCACCTG     | CTTGACGGCAATCACTGTCTGC      |
| <b>E2F3</b>      | AGCGGTCATCAGTACCTCTCAG     | TGGTGAGCAGACCAAGAGACGT      |
| <b>EFNA1</b>     | GTCTGAGAAGTTCAGCGCT        | CACTGACAGTCACCTTCAACC       |
| <b>EFNA4</b>     | GAGGCTCCAGGTGTCTGTCT       | AATGCTCCATCTTGTCTGGTCTG     |
| <b>EGR1</b>      | TGACCGCAGAGTCTTTTCT        | TGGGTTGGTCATGCTCACTA        |
| <b>EGR2</b>      | CTGACACTCCAGGTAGCGAG       | GTTGATCATGCCATCTCCGGC       |
| <b>ENOX2</b>     | GAGCTGGAGGGAACCTGATTT      | CACTGGCACTACCAAACCTGCA      |
| <b>ETS1</b>      | GAGTCAACCCAGCCTATCCA       | ATGGGATGGAGCGTCTGATA        |
| <b>FBXW7</b>     | CCTTCTCTGGAGAGAGAAATGC     | CTGTCTGATGTATGCACTTTTCC     |

|                      |                           |                            |
|----------------------|---------------------------|----------------------------|
| <b>FOXM1</b>         | TCAAAACCGAACTCCCCCTG      | GCAGCACTGATAAACAAAGAAAGA   |
| <b>FOXO1</b>         | CTACGAGTGGATGGTGAAGAGC    | CCAGTTCCTTCATTCTGCACTCG    |
| <b>FOXO3</b>         | CCTACTTCAAGGATAAGGGCGAC   | GCCTTCATTCTGAACGCGCATG     |
| <b>FURIN</b>         | CCACATGACTACTCCGCAGAT     | TACGAGGGTGAACCTGGTCAG      |
| <b>GATA3</b>         | CGAACTGTCAGACCACCACA      | GGTTTCTGGTCTGGATGCCTT      |
| <b>GEMIN2</b>        | TTGTTACCTGAGGCTCATTAC     | TCATCAGCTAAATCACGTTGGT     |
| <b>GF11</b>          | GCTCCCCAGGACCAGACTAT      | CTTCGGTCAGCTGCGATT         |
| <b>GSK3B</b>         | CGACTAACACCACTGGAAGCT     | GGATGGTAGCCAGAGGTGGAT      |
| <b>HES1</b>          | GGAGAAAAATTCCTCGTCCC      | CGCGAGCTATCTTTCTTCAG       |
| <b>HLF</b>           | GCCCATGATCAAGAAAGCTC      | GGCGATCTGGTTCTCTTTCA       |
| <b>HOXA4</b>         | ATGTCAGCGCCGTTAACCC       | TGTTGGGCAGTTTGTGGTCT       |
| <b>HOXA5</b>         | AAGTCATGACAACATAGGCGGC    | GATACTCAGGGACGGAAGGC       |
| <b>HOXA6</b>         | TGCGCGGGTGCTGTGTAT        | GCTGCGTGGAATTGATGAGC       |
| <b>HOXB4</b>         | CTGGATGCGCAAAGTTCACGTG    | CGTGTGAGGTAGCGGTTGTAGT     |
| <b>ICAT</b>          | CATGCTGCGGAAGATGGGAT      | GGAAAACGCCATCACCACGT       |
| <b>IKZF1</b>         | AACGTCGCCAACGTAAGAG       | AGTTGATGGCGTTGTTGATG       |
| <b>INHB1</b>         | AAGTCGGGGAGAACGGGTAT      | GGTCACTGCCTTCCTTGAA        |
| <b>INK4A</b>         | CTCGTGCTGATGCTACTGAGGA    | GGTCGGCGCAGTTGGGCTCC       |
| <b>INK4C</b>         | CGTCAATGCACAAAATGGATTTGG  | GAATGACAGCGAAACCAGTTCGG    |
| <b>INK4D</b>         | GTGCATCCCAGCCCTCAAC       | TGGCACCTTGCTTCAGCAGCTC     |
| <b>MDM2</b>          | TGTTTGGCGTGCCAAGCTTCTC    | CACAGATGTACCTGAGTCCGATG    |
| <b>MEIS1</b>         | AAGCAGTTGGCACAAGACACGG    | CTGCTCGGTTGGACTGGTCTAT     |
| <b>MFNG</b>          | CTGGTACAGTTCTGGTTTGC      | ATGTGTCCATGAAACGGGAGC      |
| <b>MPL</b>           | ACTCAGCGAGTCTCTTTGTGG     | CATAGCGGAGTTCGTACCTCAG     |
| <b>MPO</b>           | GCATCATCGGTACCCAGTTC      | GTGGTGATGCCTGTGTTGTC       |
| <b>MYC</b>           | GACTCTGAGGAGGAACAAGA      | TTGGCAGCAGGATAGTCCTT       |
| <b>NFKB1</b>         | AGATGATCCATATTTGGGAAGGC   | TTGCTCTAATATTTGAAGGTATGGGC |
| <b>NOTCH 1</b>       | TCCACTGTGAGAACAACACGC     | ACTCATTGACATCGTGCTGGC      |
| <b>P190 BCR-e1-A</b> | GACTGCAGCTCCAATGAGAAC     | -                          |
| <b>P210 BCR-e1-A</b> | GAAGTGTTTCAGAAGGCTTCTCC   | -                          |
| <b>p38</b>           | GAGCGTTACCAGAACCTGTCTC    | AGTAACCGCAGTTCTCTGTAGGT    |
| <b>PBX1</b>          | GGAGGATACAGTGATGGACTCG    | GGAGGTATCAGAGTGAACACTGC    |
| <b>PML</b>           | CCGTCATAGGAAGTGAGGTCTTC   | GTTTTCGGCATCTGAGTCTCCG     |
| <b>PREP1</b>         | ATTGCATCAGGAGTCGCACAGC    | GAGACTGAAGGCTGTCCACGTT     |
| <b>PSEN1</b>         | GGTGGTTCTGTATAAATACAGGTGC | AACAGTAATGTAGTCCACAGCAA    |
| <b>RUNX1</b>         | CACCTACCACAGAGCCATCAA     | CTCGAAAAGGACAAGCTCC        |
| <b>SPI1</b>          | GTGCCATGACACGGATCT        | AAGCTCTCGAACTCGCTGTG       |
| <b>STIL</b>          | GACACAGTGCAAGCTGGAAGAC    | AGTCAGGCTCTTGATCCTCACC     |
| <b>TP53</b>          | TTCTTGCACTTCTGGGACAGCC    | GGGGGTGTGGAATCAACCC        |
| <b>TP73</b>          | ACTTTGAGATCCTGATGAAGC     | GAGGACCGGCCCGTAGGA         |
| <b>TYW1</b>          | ATTGTCATCAAGACGCAGGGC     | GTTGCGAATCCCTTCGCTGTT      |
| <b>UBE2D2</b>        | CCATGGCTCTGAAGAGAATCC     | GATAGGGACTGTCATTTGGCC      |
| <b>VEGF</b>          | AGAAGGAGGAGGGCAGAATCA     | AGGGTACTCCTGGAAGATGTCC     |
| <b>WWTR1</b>         | GAGGACTTCTCAGCAATGTGG     | CGTTTGTCTGGAAGACAGTCA      |

**Figure S1: Cell surface markers are deregulated between normal and CP-CML HSCs**

Mean expression levels between normal HSCs (n=3) and CP-CML (n=6) from GSE47297 were normalised across each gene (z score) and represented using heatmap.2 in R/Bioconductor. Yellow represents increased expression and blue represents decreased expression within the data set. Samples could be clustered into disease process, i.e. normal and CP-CML.

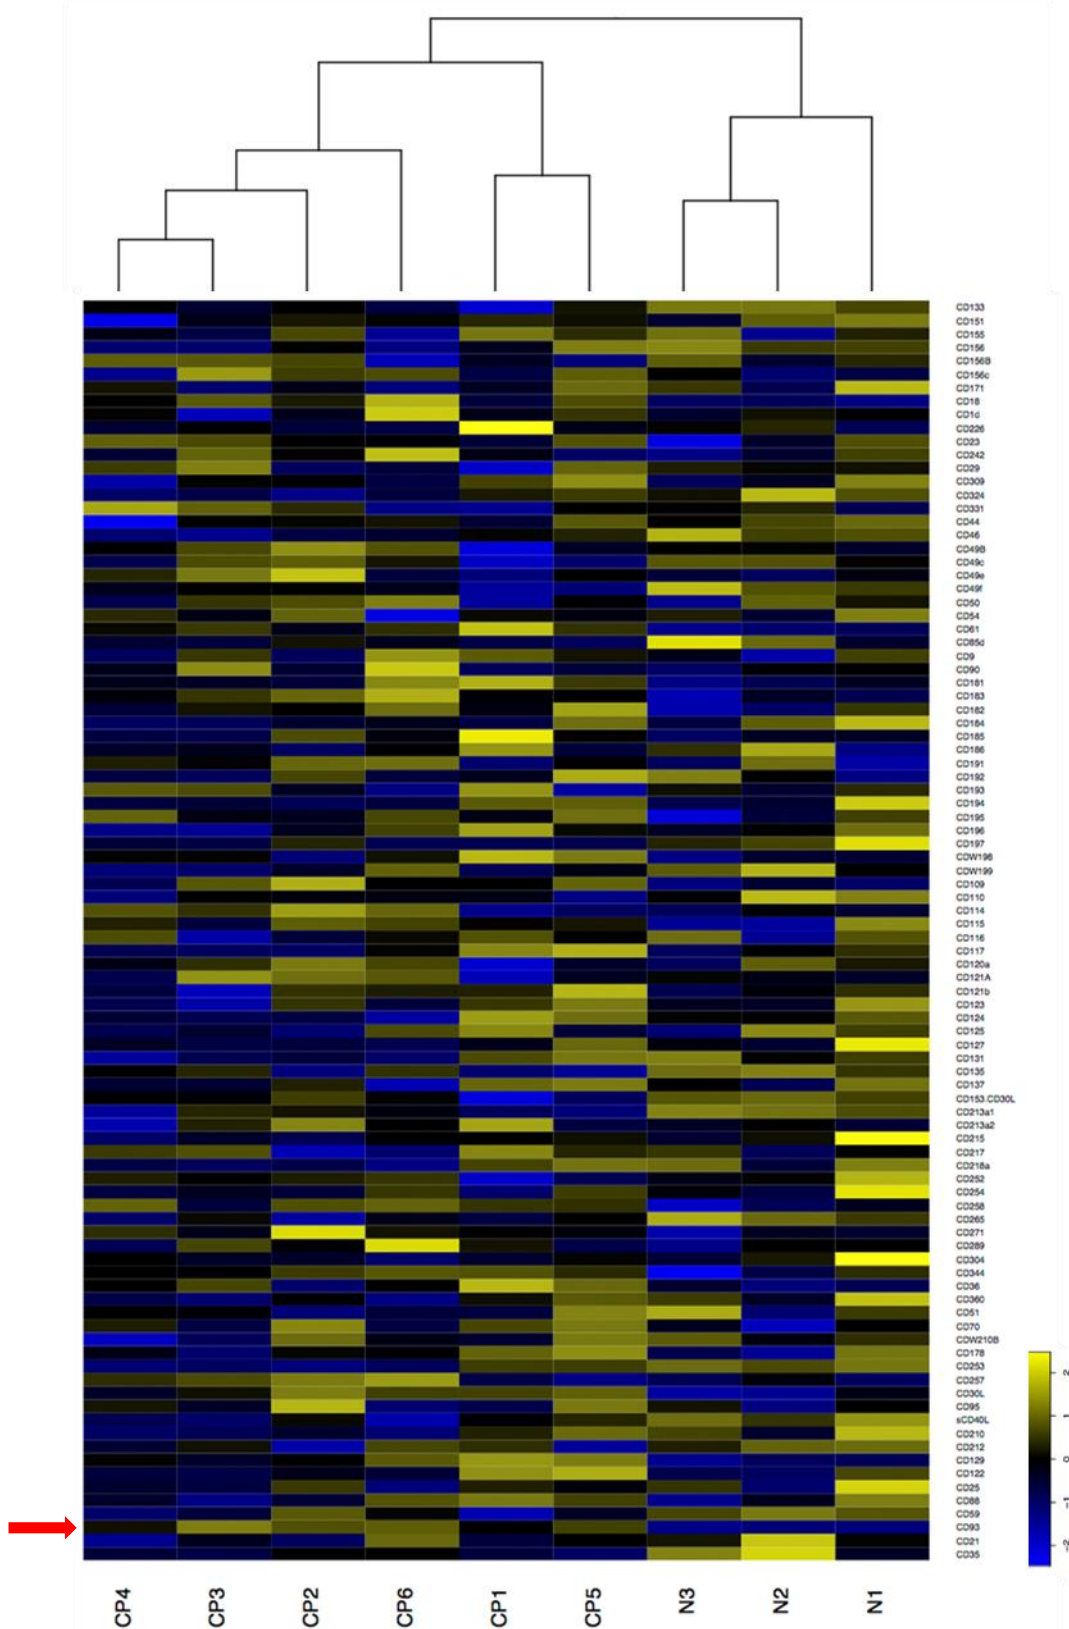

Figure S2: Sorting strategy for Lin<sup>-</sup>CD34<sup>+</sup>CD38<sup>-</sup>CD90<sup>+</sup>CD93<sup>+/-</sup> populations

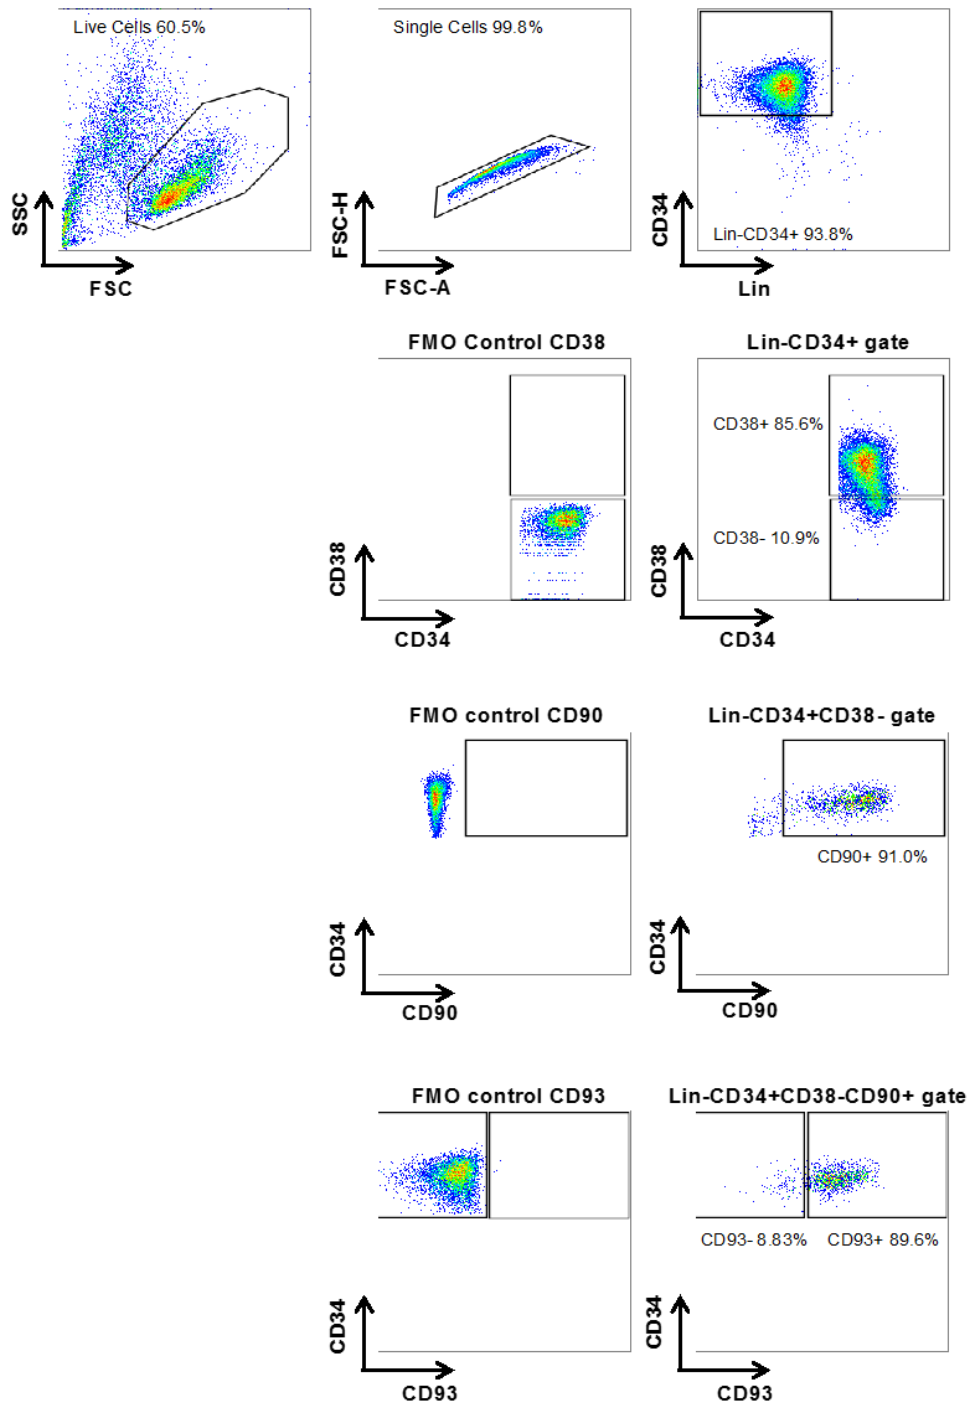

**Figure S3: *BCR-ABL* analysis by FISH prior to NSG engraftment model**

Chromosome t(9;22) *BCR-ABL* fusion was detected by a dual colour dual fusion probe (Abbott Molecular). Upon thawing, all samples were *BCR-ABL* positive, with only one sample (CML395 = CML5 in text) being less than 100%.

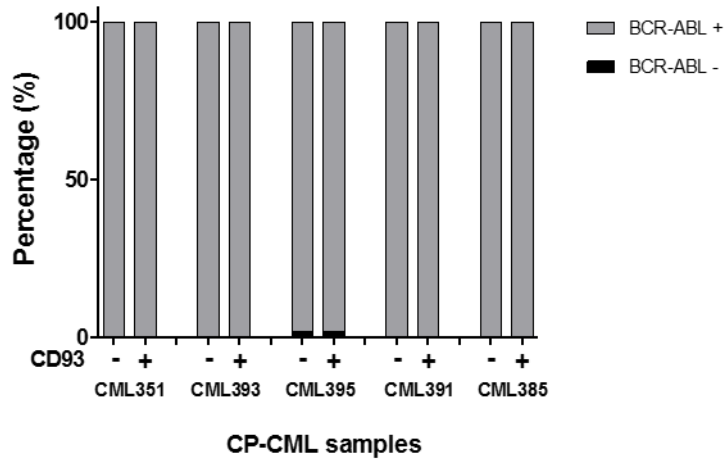

**Figure S4: Engraftment was not identified at 8 weeks in CD93<sup>+</sup> or CD93<sup>-</sup> populations**

Blood sampling was performed at 8 weeks. CD45<sup>+</sup>CD33<sup>+</sup> cells were determined as a percentage of total cells. There was no statistical difference between the experimental arms at 8 weeks, suggesting that either engraftment had not yet occurred, or that engraftment potential was unable to be determined from peripheral blood sampling. n=3 CP-CML samples (CML1, CML2, and CML5 in text), p-value calculated from paired student's T test between arms of the experiment for each CP-CML sample.

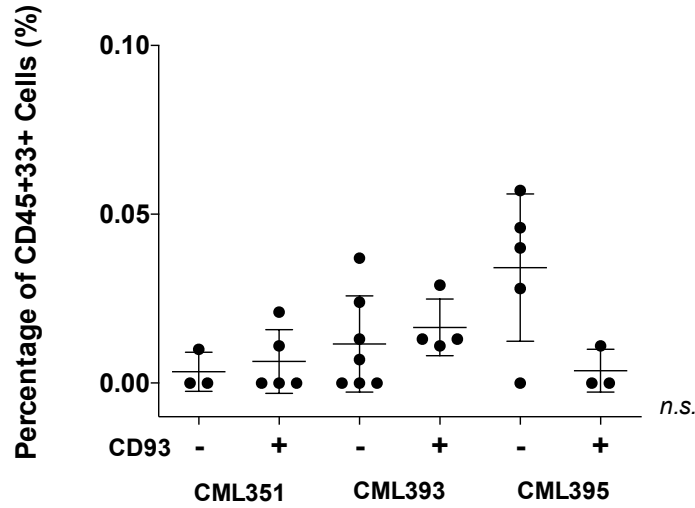

**Figure S5: Non-BCR-ABL engraftment leads to multi-lineage cell potential in sample CML395 (CML5 in text)**

(A) Human cell engraftment was characterized by percentage of CD45<sup>+</sup>CD33<sup>+</sup>. (B) Human CD45<sup>+</sup> cells were isolated by FACS sorting and analysed by FISH for the *BCR-ABL*<sup>-</sup> gene rearrangement. Percentage of *BCR-ABL* positive cells, as determined from analysis of 100 cells, was assessed for each murine experiment. All mice within the CD93<sup>-</sup> experimental arm were predominantly *BCR-ABL* negative, with a variably sized *BCR-ABL* positive population evident within the CD93<sup>+</sup> arm. (C) Example of FACS analysis isolating both myeloid and lymphoid lineages within the CD45<sup>+</sup> sample.

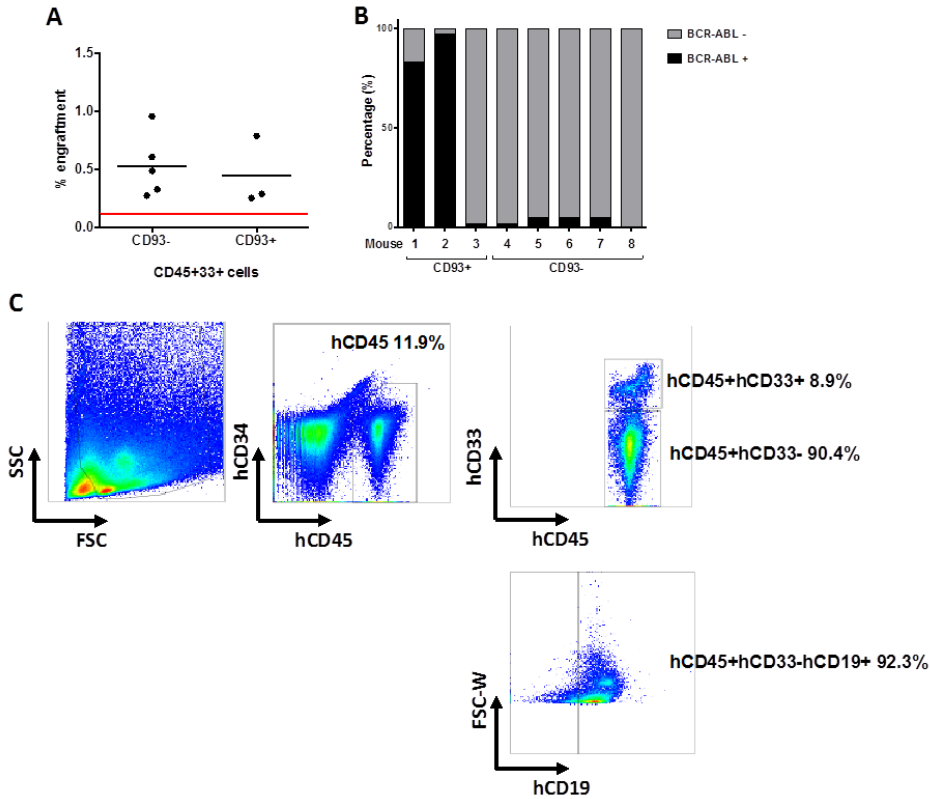



**Figure S6: Frequency of gene expression within single cell analysis and STRING map of genes with increased frequency related to *GATA1***

**A**

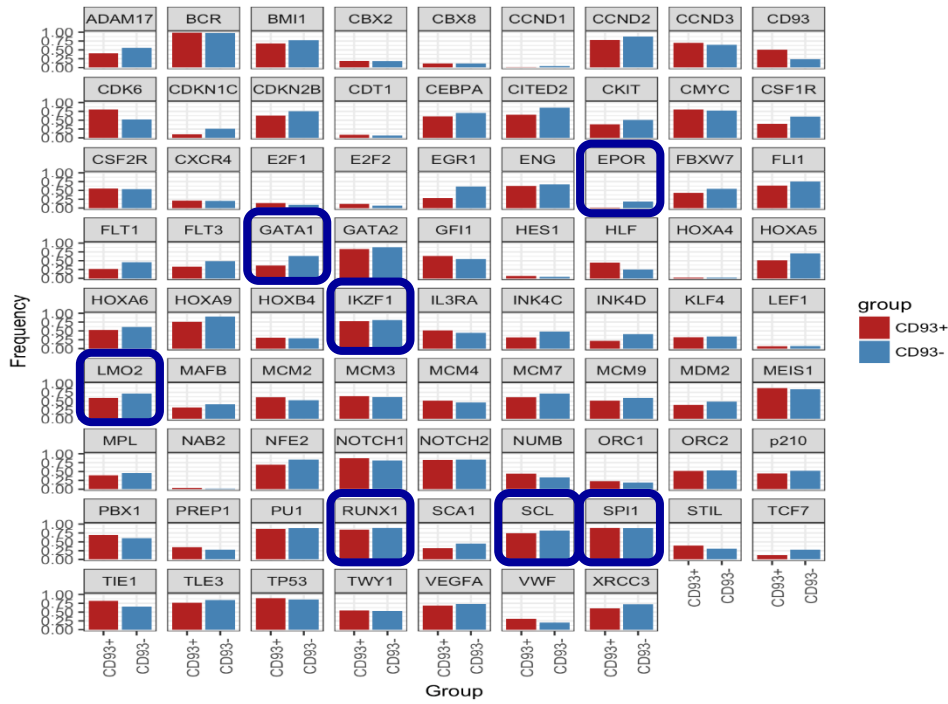

**B**

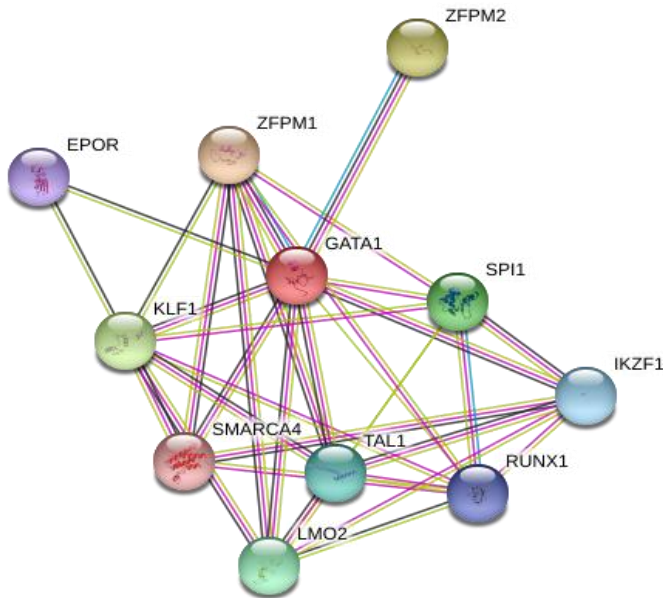

Figure S7: Gene clustering cannot clearly discriminate between CD93+ and CD93- populations at single cell level

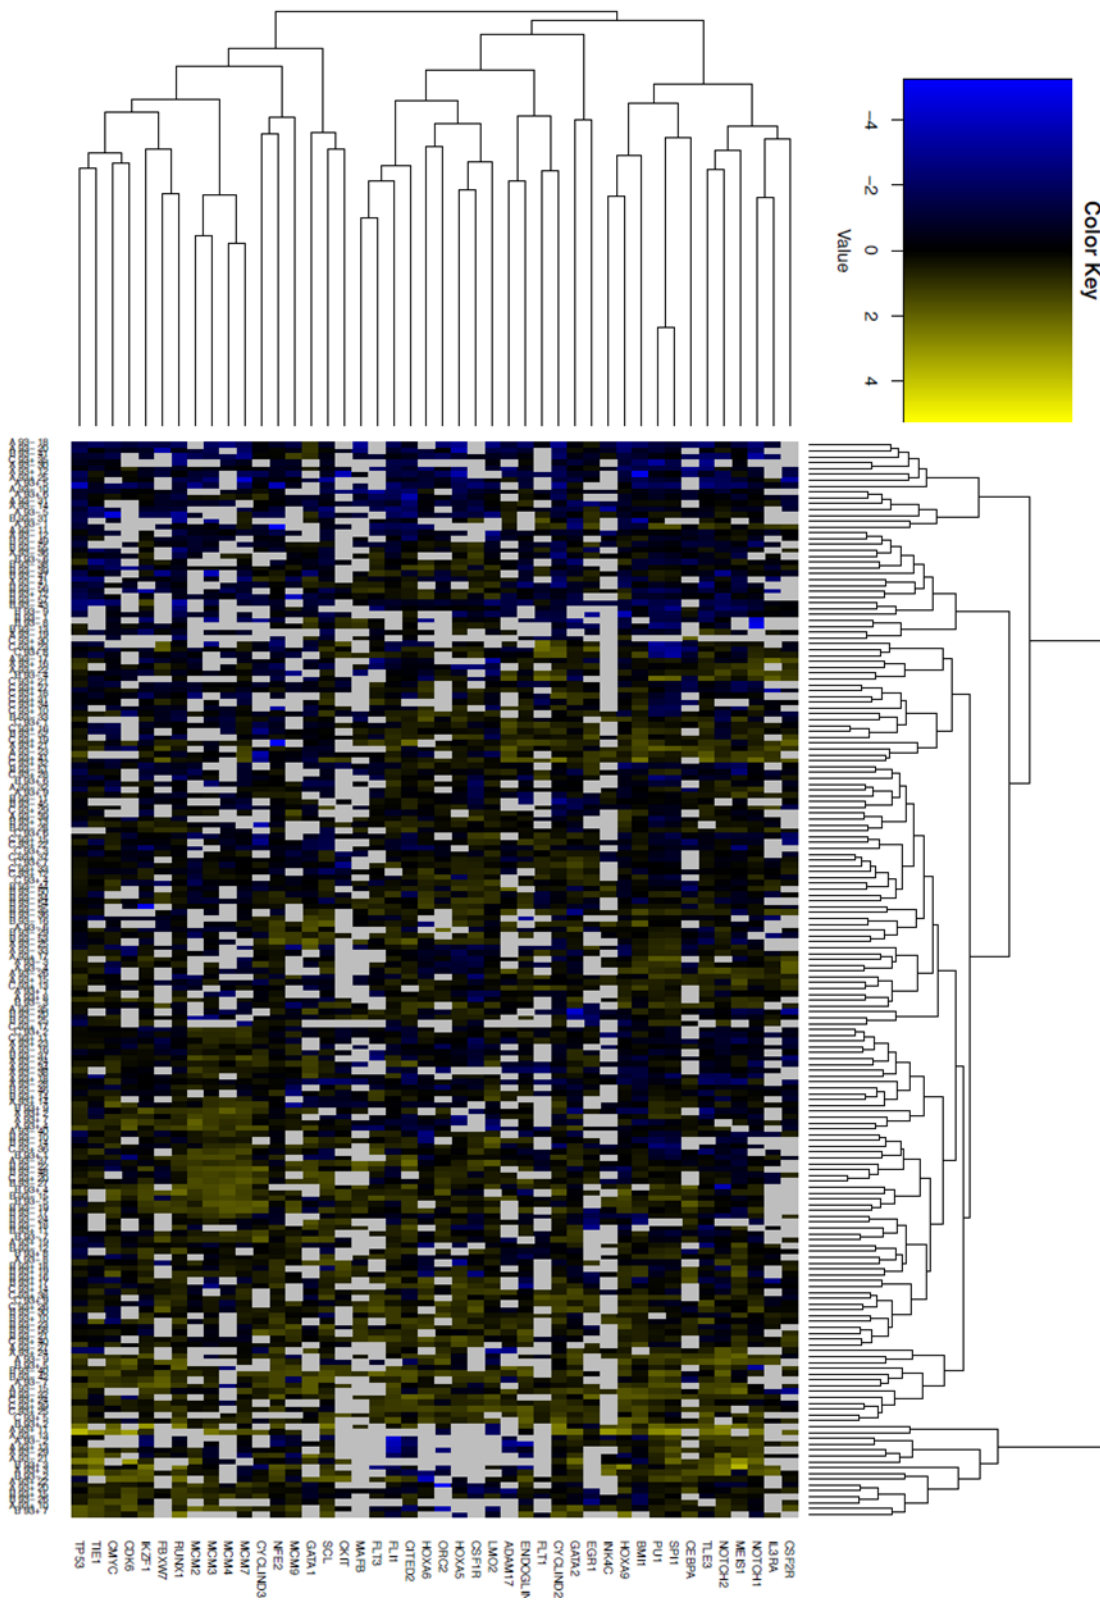

**Figure S8: *BCR-ABL* expression in CD93-selected LSC populations**

(A) To assess *BCR-ABL* expression, FISH for the *BCR-ABL* gene rearrangement was used. Percentage of *BCR-ABL* positive cells, as determined from analysis of a minimum of 100 cells, was assessed for each murine experiment where cell numbers allowed (n=2). (B) Representative FISH images of *BCR-ABL* expression in  $lin^{-}CD34^{+}CD38^{-}CD90^{+}CD93^{+}$  and  $lin^{-}CD34^{+}CD38^{-}CD90^{+}CD93^{-}$  populations.

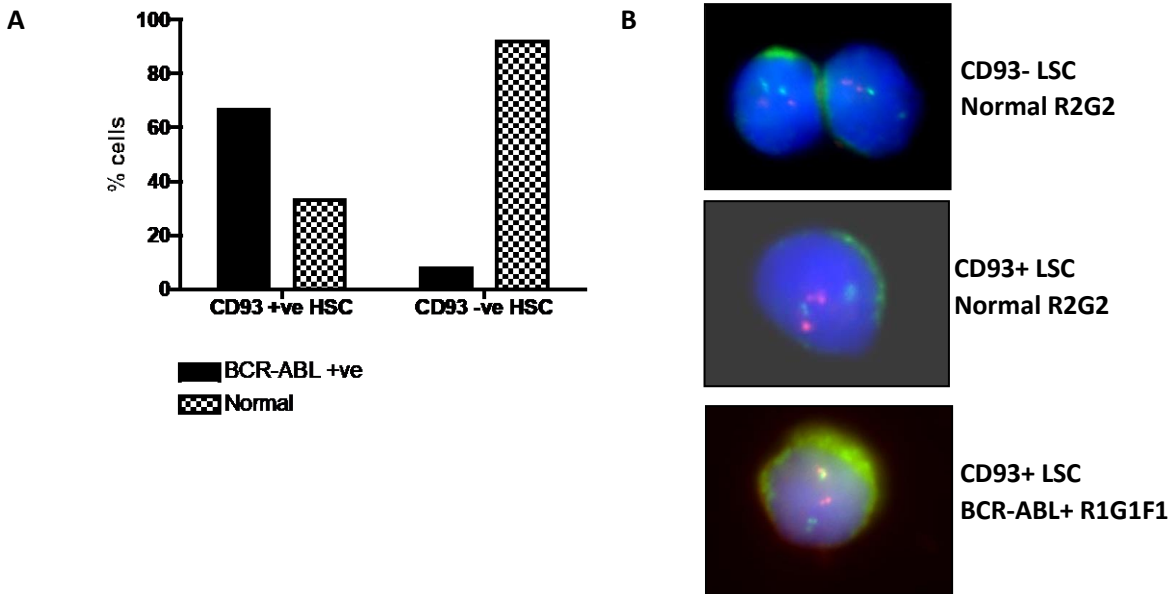

Supplement: EMS85133-supplement-Supplementary_information.pdf [file EMS85133-supplement-Supplementary_information.pdf]
